# Supplementary material for: A high-strength double network polydopamine nanocomposite hydrogel for adhesion under seawater
Source: Royal Society of Chemistry journal article supplement (doi:10.1039/d0tb00513d), 2020-01-01
Supplement: d0tb00513d1.pdf [file d0tb00513d1.pdf]

## **Electronic Supplementary Information**

### **High-strength double network polydopamine nanocomposite hydrogel for adhesion under seawater**

Min Liang, Chunpeng He, Jidong Dai, Pengfei Ren, Yifu Fu, Faming Wang, Xin Ge,  
Tianzhu Zhang\* and Zuhong Lu

State Key Lab of Bioelectronics, National Demonstration Center for Experimental  
Biomedical Engineering Education, School of Biological Science and Medical  
Engineering, Southeast University, Nanjing 210096, China.

\*Corresponding author: zhangtianzhu@seu.edu.cn (Tianzhu Zhang)

Table S1. The Ratio of Components in Different Hydrogels.

| Hydrogel                                             | Am<br>(wt%) | Alg-Na<br>(wt%) | $m_{DA} / m_{Am}$<br>(%) | $m_{MBAm} / m_{Am}$<br>(%) | $m_{APS} / m_{Am}$<br>(%) |
|------------------------------------------------------|-------------|-----------------|--------------------------|----------------------------|---------------------------|
| PAM                                                  | 12          | —               | —                        | 0.8                        | 10                        |
| PAM-PDA                                              | 12          | —               | 0.6                      | 0.8                        | 10                        |
| PAM-Alg                                              | 12          | 1.5             | —                        | 0.8                        | 10                        |
| PAM <sub>x</sub> -Alg <sub>y</sub> -PDA <sub>z</sub> | x           | y               | z                        | 0.8                        | 10                        |

Table S2. Components of Artificial Seawater (pH=8.0).

| Inorganic salt                       | Concentration (g/L) |
|--------------------------------------|---------------------|
| NaCl                                 | 25.5                |
| KCl                                  | 0.67                |
| MgCl <sub>2</sub> •6H <sub>2</sub> O | 4.7                 |
| MgSO <sub>4</sub>                    | 6.3                 |
| CaCl <sub>2</sub>                    | 1.35                |
| NaHCO <sub>3</sub>                   | 0.18                |

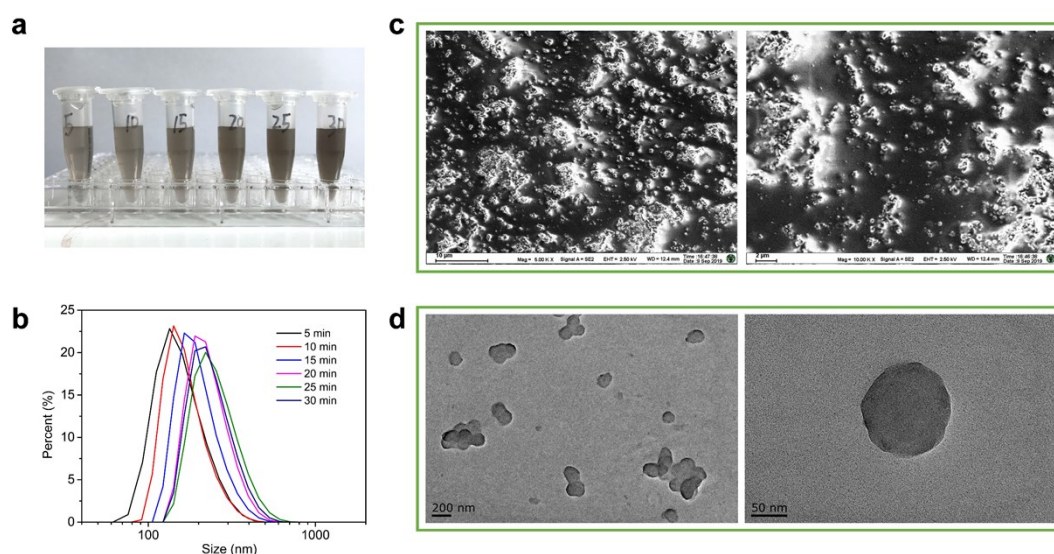

Figure S1. (a) The optical images of PDA/TEA solution (0.72 mg/mL) (TEA buffer solution: 0.2 M, pH = 9.8) with different oxidation time (5 min, 10 min, 15 min, 20 min, 25 min, 30 min); (b) The size of PDA nanoparticle measured by dynamic light scattering (Zetasizer Nano ZS90, Malvern, UK) with different oxidation time; (c) The SEM images of PDA nanoparticle formed after 20 min of oxidation; (d) The transmission electron microscope (JEM-2100, JEOL, Japan) images of PDA nanoparticle formed after 20 min of oxidation.

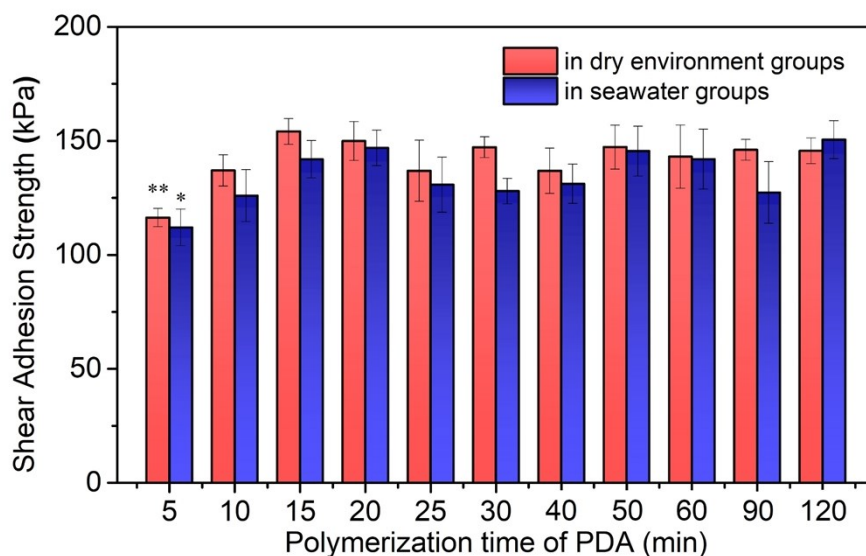

Figure S2. The shear adhesion strength of PAM<sub>12</sub>-Alg<sub>1.5</sub>-PDA<sub>0.6</sub> hydrogel on glass with different polymerization time of PDA (\* $p < 0.05$ , \*\* $p < 0.01$ , vs. the maximum adhesion strength in the same test environment).

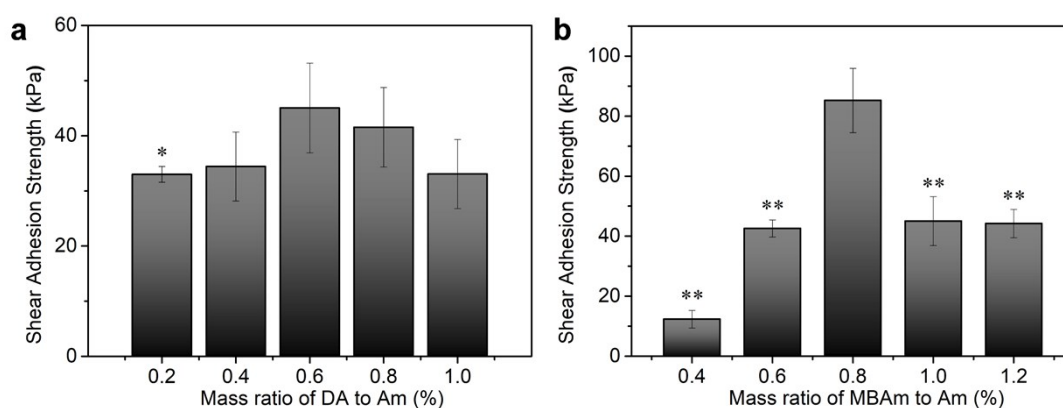

Figure S3. The shear adhesion strength of PAM-PDA hydrogel on glass in dry environment with different concentration of (a) DA and (b) MBAm (\* $p < 0.05$ , \*\* $p < 0.01$ , vs. the maximum adhesion strength in the same test environment).

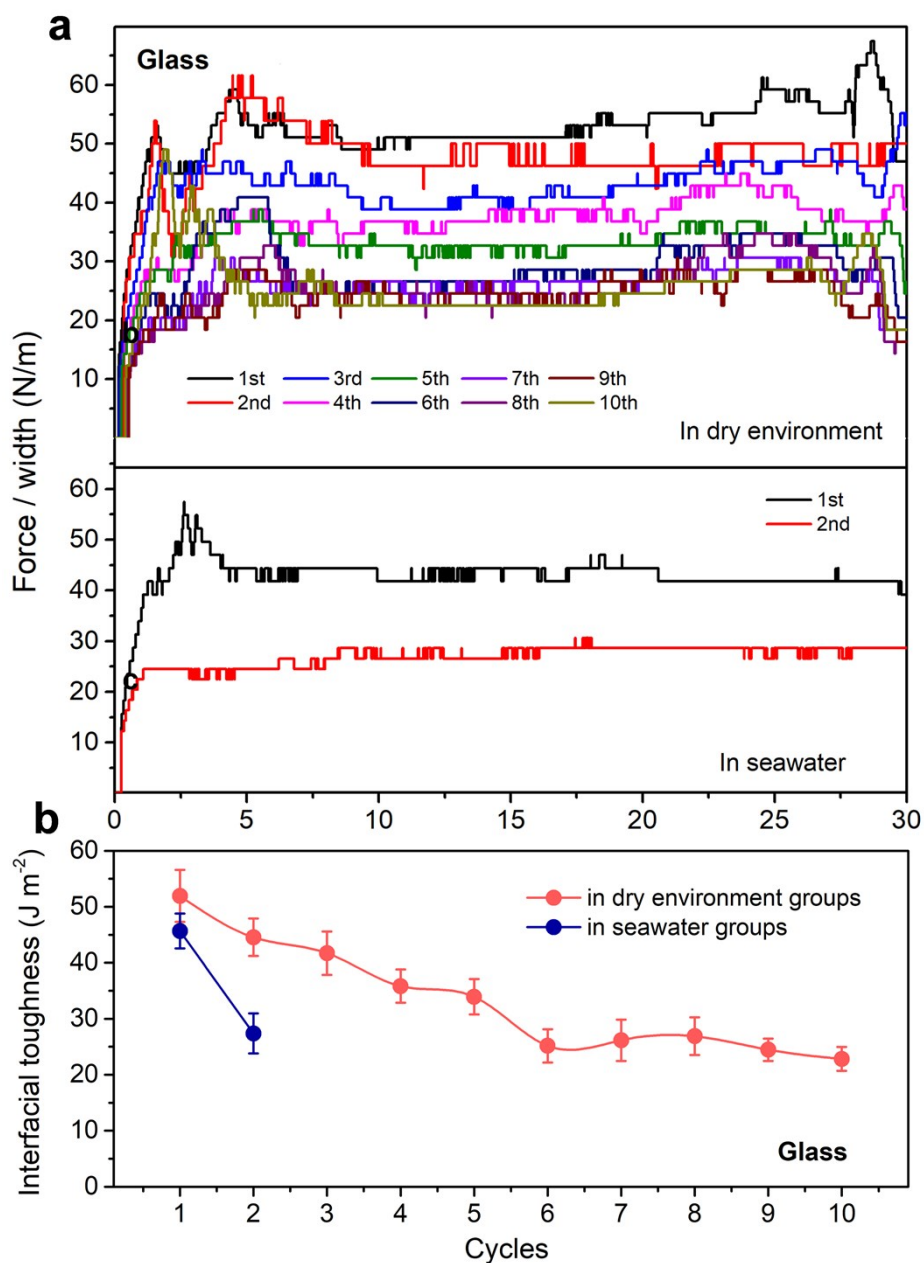

Figure S4. Reversible surface adhesion tests on the glass of  $\text{PAM}_{12}\text{-Alg}_{1.5}\text{-PDA}_{0.6}$  hydrogel by 90-degree peeling test in dry environment and in seawater (a). Mechanical testing machine (FLR-303, Flora Automatic Technology, China) pulled the hydrogel sheet [length (L)  $\times$  width (W)  $\times$  thickness (T) = 45  $\times$  24  $\times$  3 mm] together with stiff backing (a combination of A4 paper and double-sided tape, T = 60  $\mu\text{m}$ ) in 90 degrees from the substrate. (b) The interfacial toughness was calculated by dividing the steady-state (or plateau) peeling force with the sample width.

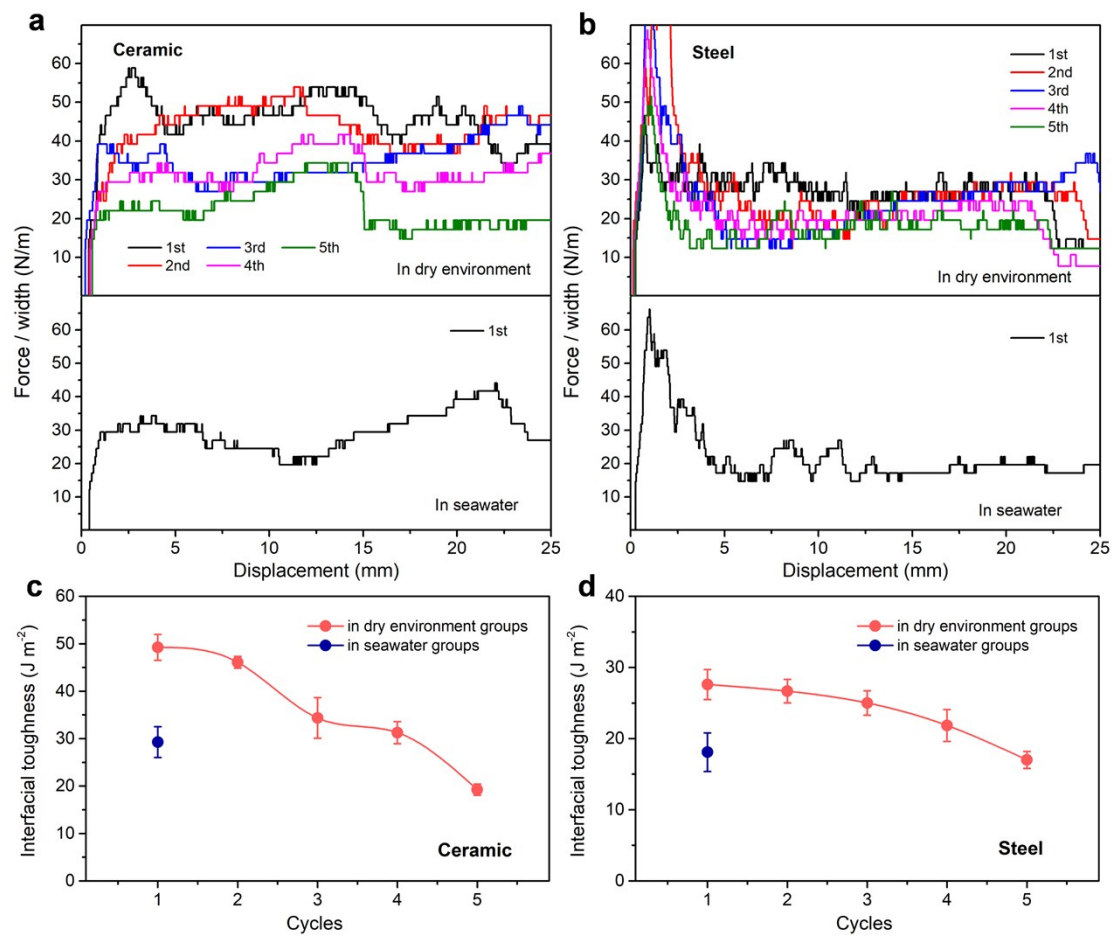

Figure S5. Reversible surface adhesion tests on ceramic (a, c) and steel (b, d) of PAM<sub>12</sub>-Alg<sub>1.5</sub>-PDA<sub>0.6</sub> hydrogel by 90-degree peeling test in dry environment and in seawater.

Table S3. Post Hoc Test by Tukey HSD Analysis to Determine Statistical Differences in the Mean Values of Shear Adhesion Strength of Multiple Hydrogel Groups with Varying Am Content in Dry Environment (Bottom Left) and in Artificial Seawater (Upper Right).

|        | Seawater | 8 wt% | 10 wt% | 12 wt% | 14 wt% | 16 wt% |
|--------|----------|-------|--------|--------|--------|--------|
| Dry    |          |       |        |        |        |        |
| 8 wt%  |          |       |        | **     | **     | *      |
| 10 wt% |          |       |        | **     |        | **     |
| 12 wt% |          | **    | **     |        |        | **     |
| 14 wt% |          | **    | **     |        |        | **     |
| 16 wt% |          | **    |        |        |        |        |

\*p < 0.05; \*\*p < 0.01

Table S4. Post Hoc Test by Tukey HSD Analysis to Determine Statistical Differences in the Mean Values of Shear Adhesion Strength of Multiple Hydrogel Groups with Varying DA Content in Dry Environment (Bottom Left) and in Artificial Seawater (Upper Right).

|       | Seawater | 0 % | 0.2 % | 0.4 % | 0.6 % | 0.8 % | 1.0 % | 1.2 % |
|-------|----------|-----|-------|-------|-------|-------|-------|-------|
| Dry   |          |     |       |       |       |       |       |       |
| 0 %   |          |     |       | **    | **    | **    |       |       |
| 0.2 % |          |     |       | **    | **    | **    |       | *     |
| 0.4 % |          | **  | **    |       | **    |       | **    | **    |
| 0.6 % |          | **  | **    |       |       | **    | **    | **    |
| 0.8 % |          | **  | **    |       | *     |       | **    | **    |
| 1.0 % |          |     |       | **    | **    | **    |       |       |
| 1.2 % |          |     |       | **    | **    | **    |       |       |

\*p < 0.05; \*\*p < 0.01

Table S5. Post Hoc Test by Tukey HSD Analysis to Determine Statistical Differences in the Mean Values of Shear Adhesion Strength of Multiple Hydrogel Groups with Varying Alg-Na Content in Dry Environment (Bottom Left) and in Artificial Seawater (Upper Right).

|         | Seawater | 0 wt% | 0.5 wt% | 1 wt% | 1.5 wt% | 2 wt% | 2.5 wt% | 3 wt% |
|---------|----------|-------|---------|-------|---------|-------|---------|-------|
| Dry     |          |       |         |       |         |       |         |       |
| 0 wt%   |          |       | **      | **    | **      | **    | **      | **    |
| 0.5 wt% |          | **    |         | **    | **      | **    |         |       |
| 1 wt%   |          | **    |         |       | **      |       | **      | **    |
| 1.5 wt% |          | **    |         |       |         | *     | **      | **    |
| 2 wt%   |          | **    |         |       |         |       | **      | **    |
| 2.5 wt% |          |       | **      | **    | **      | **    |         |       |
| 3 wt%   |          |       | **      | **    | **      | **    |         |       |

\*p < 0.05; \*\*p < 0.01

Table S6. Adhesion Strength Comparison between the PAM-Alg-PDA Hydrogel and Other Types of Adhesives Reported in the Literature.

| No. | Type of Adhesive | Adhesive Substrate | Curing Weight | Curing Temperature | Curing Time | Curing Environment | Testing Machine | Adhesion Strength (kPa) | Refs.     |
|-----|------------------|--------------------|---------------|--------------------|-------------|--------------------|-----------------|-------------------------|-----------|
| 1   | hydrogel         | glass              | 100 g         | NM                 | 2 min       | air                | Instron 5583    | ~ 105                   | 1         |
| 2   | hydrogel         | glass              | NM            | 60°C               | 30 min      | air                | Instron 1185    | 2990 ± 120              | 2         |
| 3   | hydrogel         | glass              | NM            | NM                 | NM          | air                | Instron 5542    | 1084.9 ± 104.6          | 3         |
| 4   | hydrogel         | glass              | NM            | RT                 | none        | air                | Zwell/Roell     | ~ 6                     | 4         |
| 5   | hydrogel         | glass              | metal clip    | RT                 | 6 h         | air                | FLR-303         | 167.4 ± 11.5            | this work |
| 6   | hydrogel         | glass              | NM            | NM                 | 24 h        | water              | Shimadzu AGS-X  | ~ 45                    | 5         |
| 7   | hydrogel         | glass              | metal clip    | RT                 | 24 h        | seawater           | FLR-303         | 146.8 ± 7.8             | this work |
| 8   | hydrogel         | aluminum           | metal clip    | RT                 | 24 h        | water              | Hengyi HY-0580  | ~ 1500                  | 6         |
| 9   | hydrogel         | porcine skin       | metal clip    | RT                 | 2 h         | PBS buffer         | Instron 5544    | ~ 215                   | 7         |
| 10  | hydrogel         | porcine skin       | metal clip    | RT                 | 2 h         | PBS buffer         | Instron 5544    | ~ 53                    | 8         |
| 11  | hydrogel         | porcine skin       | NM            | RT                 | 2 h         | PBS buffer         | Instron 5544    | 72.2 ± 3.7              | 9         |
| 12  | hydrogel         | porcine skin       | NM            | RT                 | 2 h         | air                | Instron 5544    | 30.4 ± 3.4              | 10        |
| 13  | copolymer        | glass              | NQ            | RT                 | 4 h         | air                | Shimadzu AG-I   | 15.8 ± 1.7              | 11        |
| 14  | copolymer        | glass              | NM            | RT                 | NM          | air                | NM              | ~ 1500                  | 12        |
| 15  | copolymer        | glass              | 35 kPa        | NM                 | 15 min      | water              | Instron 5944    | 27.8 ± 2.5              | 13        |
| 16  | copolymer        | glass              | binder clips  | RT                 | 12 h        | water              | NM              | ~ 200                   | 12        |
| 17  | copolymer        | glass              | 20 g          | NM                 | 6 d         | seawater           | Shimadzu AGX    | ~ 300                   | 14        |
| 18  | copolymer        | aluminum           | metal clip    | NM                 | 24 h        | water              | Instron 3342    | ~ 765                   | 15        |
| 19  | copolymer        | aluminum           | 35 kPa        | NM                 | 15 min      | water              | Instron 5944    | 24.1 ± 3.1              | 13        |
| 20  | copolymer        | aluminum           | 55 g          | RT                 | 24 h        | seawater           | Instron 5544    | 400 ± 200               | 16        |
| 21  | protein glue     | glass              | NQ            | RT                 | 5 min       | air                | Instron 5965    | 216 ± 80.4              | 17        |
| 22  | protein glue     | aluminum           | 55 g          | 37°C               | 24 h        | air                | Instron 5544    | 2600 ± 600              | 18        |

23 protein glue aluminum NQ 37°C NM water Instron 5544 240 ± 90 18  
\*NM means not mentioned. RT means room temperature. NQ means not quantified.



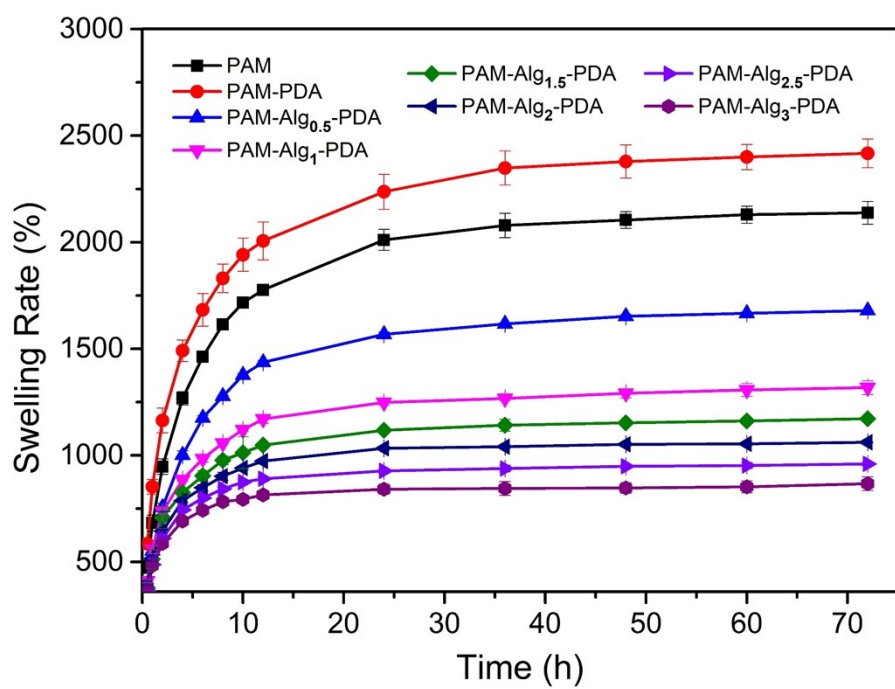

Figure S6. The swelling behavior of various freeze-dried hydrogels.

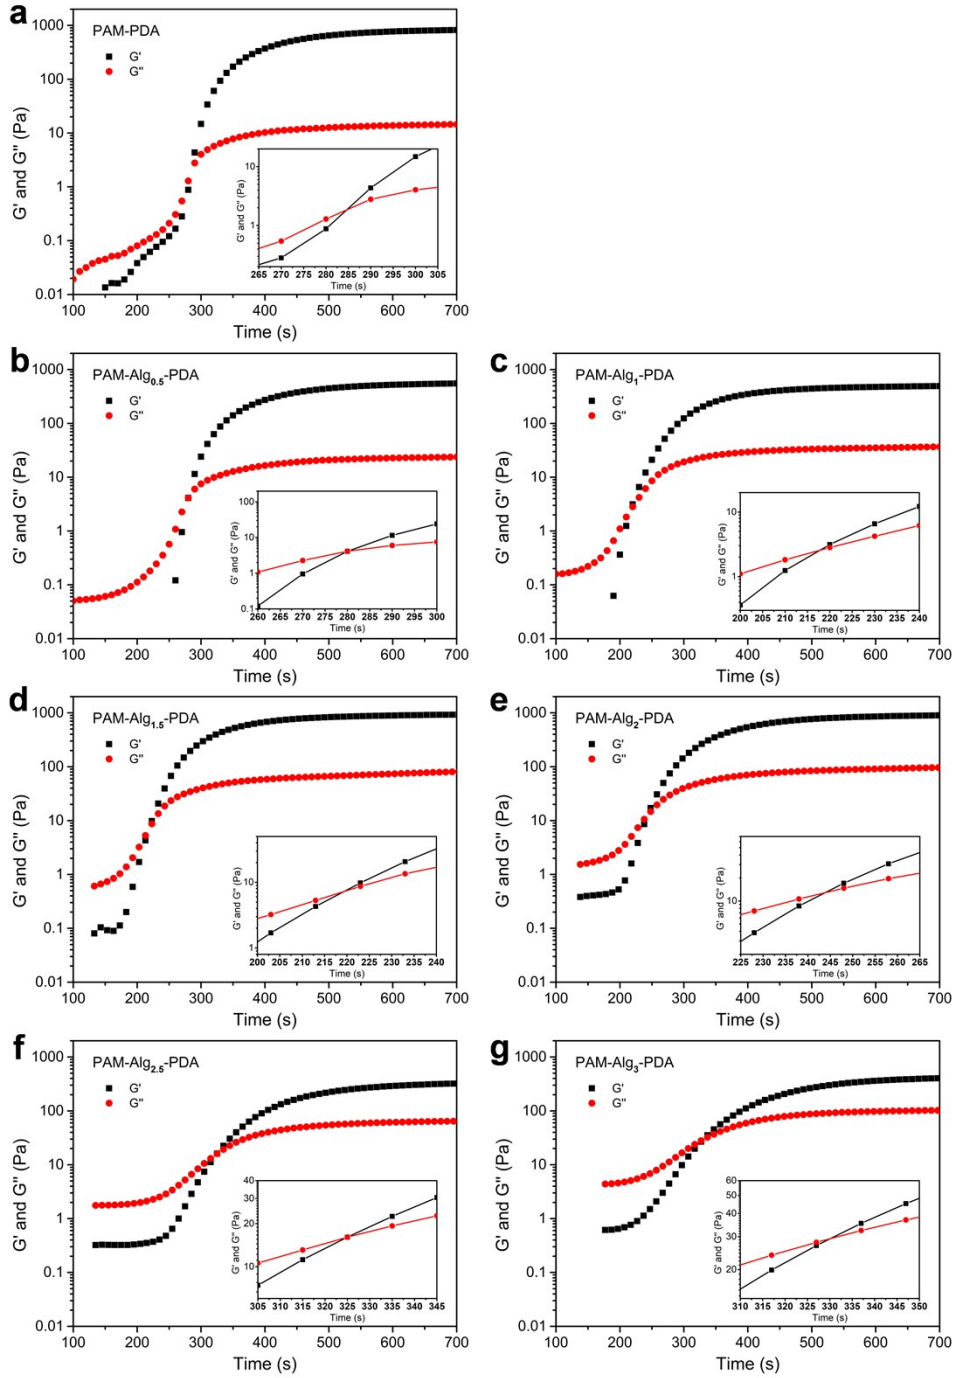

Figure S7. The time required for precursor solution of different hydrogels in the phase transition process of sol-gel. (a) PAM-PDA hydrogel; (b) PAM-Alg<sub>0.5</sub>-PDA hydrogel; (c) PAM-Alg<sub>1</sub>-PDA hydrogel; (d) PAM-Alg<sub>1.5</sub>-PDA hydrogel; (e) PAM-Alg<sub>2</sub>-PDA hydrogel; (f) PAM-Alg<sub>2.5</sub>-PDA hydrogel; (g) PAM-Alg<sub>3</sub>-PDA hydrogel. The gelation time of PAM hydrogel was too fast (~30 s), so that it cannot be measured by rheometer.

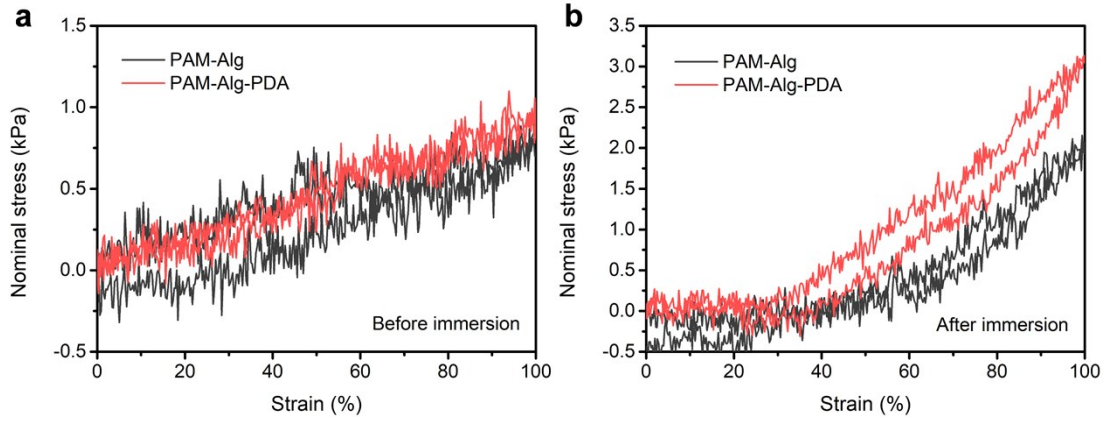

Figure S8. Loading-unloading curves of PAM-Alg and PAM-Alg-PDA hydrogels before immersion (a) and after immersion in seawater for 3 days (b), respectively (Instron 5940, Instron, America). Each sample is stretched to a strain of 100%.

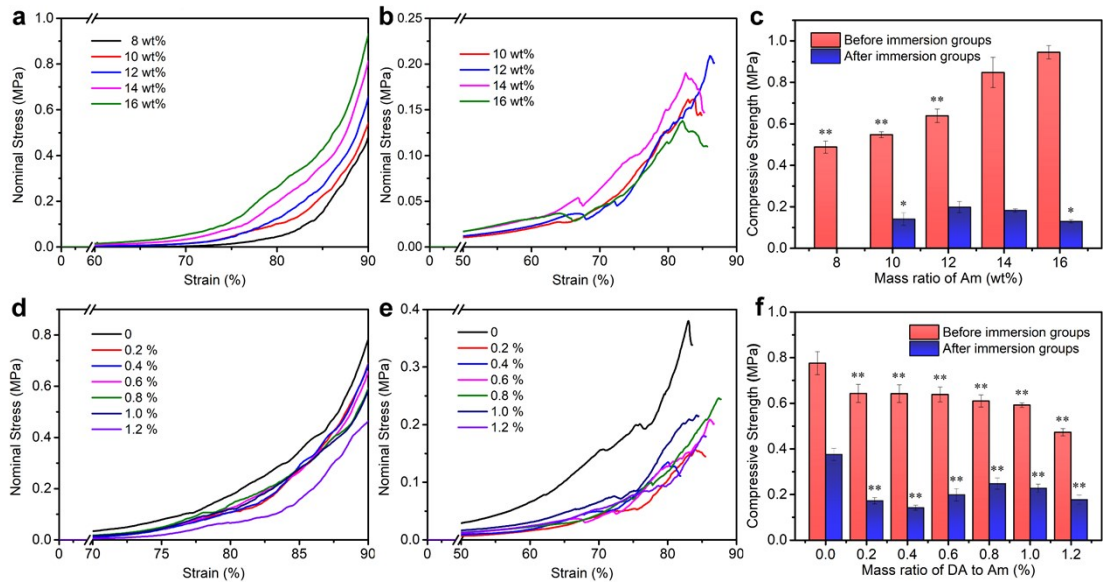

Figure S9. Compressive stress-strain curves of hydrogels with different content of Am and DA before immersion (a, d) and after immersion in artificial seawater for 3 days (b, e), respectively; (g) Compressive strength of PAM-Alg-PDA hydrogel with different content of Am (c) and DA (f), respectively (\* $p < 0.05$ , \*\* $p < 0.01$ , vs. the maximum compressive strength in the same test environment).

Table S7. Post Hoc Test by Tukey HSD Analysis to Determine Statistical Differences in the Mean Values of Compressive Strength of Multiple Hydrogel Groups with Varying Am Content before Immersion (Bottom Left) and after Immersion (Upper Right).

|        | After | 8 wt% | 10 wt% | 12 wt% | 14 wt% | 16 wt% |
|--------|-------|-------|--------|--------|--------|--------|
| Before |       |       |        |        |        |        |
| 8 wt%  |       |       | —      | —      | —      | —      |
| 10 wt% |       |       |        | *      |        |        |
| 12 wt% |       | **    |        |        |        | *      |
| 14 wt% |       | **    | **     | **     |        |        |
| 16 wt% |       | **    | **     | **     |        |        |

\*p < 0.05; \*\*p < 0.01

Table S8. Post Hoc Test by Tukey HSD Analysis to Determine Statistical Differences in the Mean Values of Compressive Strength of Multiple Hydrogel Groups with Varying DA Content before Immersion (Bottom Left) and after Immersion (Upper Right).

|       | Seawater | 0 % | 0.2 % | 0.4 % | 0.6 % | 0.8 % | 1.0 % | 1.2 % |
|-------|----------|-----|-------|-------|-------|-------|-------|-------|
| Dry   |          |     |       |       |       |       |       |       |
| 0 %   |          |     | **    | **    | **    | **    | **    | **    |
| 0.2 % |          | **  |       |       |       | **    |       |       |
| 0.4 % |          | **  |       |       |       | **    | **    |       |
| 0.6 % |          | **  |       |       |       |       |       |       |
| 0.8 % |          | **  |       |       |       |       |       | *     |
| 1.0 % |          | **  |       |       |       |       |       |       |
| 1.2 % |          | **  | **    | **    | **    | **    | **    |       |

Table S9. Post Hoc Test by Tukey HSD Analysis to Determine Statistical Differences in the Mean Values of Compressive Strength of Multiple Hydrogel Groups with Varying Alg-Na Content before Immersion (Bottom Left) and after Immersion (Upper Right).

|         | Seawater | 0 wt% | 0.5 wt% | 1 wt% | 1.5 wt% | 2 wt% | 2.5 wt% | 3 wt% |
|---------|----------|-------|---------|-------|---------|-------|---------|-------|
| Dry     |          |       |         |       |         |       |         |       |
| 0 wt%   |          |       |         | **    | **      | **    |         |       |
| 0.5 wt% |          |       |         | **    | **      | **    |         |       |
| 1 wt%   |          |       |         |       |         | **    | **      | **    |
| 1.5 wt% |          |       | **      | *     |         | **    | **      | **    |
| 2 wt%   |          | *     | **      | **    |         |       | **      | **    |
| 2.5 wt% |          | **    | **      | **    | *       |       |         |       |
| 3 wt%   |          | **    | **      | **    | **      |       |         |       |

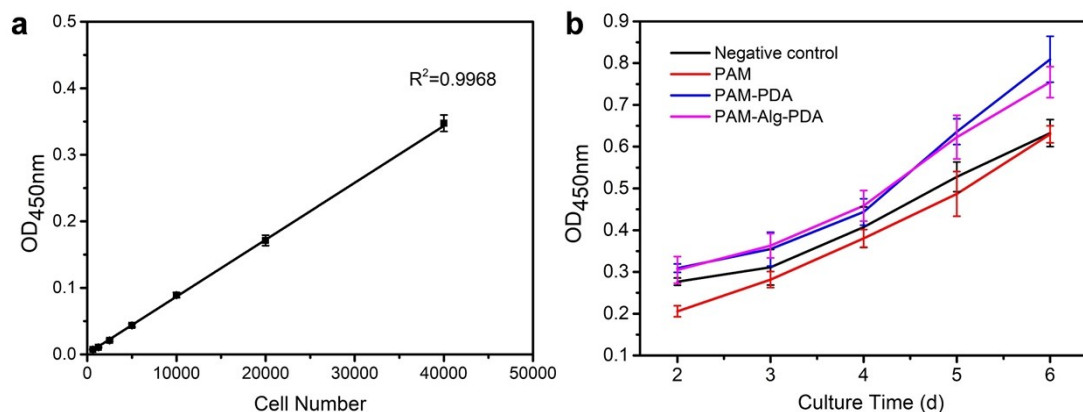

Figure S10. (a) Zooxanthellae cell number determination using CCK-8; (b) The growth curve of zooxanthellae cell cultured with various hydrogels.

## References

- 1 H. Fan, J. Wang, Q. Zhang and Z. Jin, *ACS Omega*, 2017, **2**, 6668-6676.
- 2 H. Li, R. Niu, J. Yang, J. Nie and D. Yang, *Carbohydr. Polym.*, 2011, **86**, 1578-1585.
- 3 N. Annabi, D. Rana, E. S. Sani, R. Portillo-Lara, J. L. Gifford, M. M. Fares, S. M. Mithieux and A. S. Weiss, *Biomaterials*, 2017, **139**, 229-243.
- 4 C. Shao, M. Wang, L. Meng, H. Chang, B. Wang, F. Xu, J. Yang and P. Wan, *Chem. Mater.*, 2018, **30**, 3110-3121.
- 5 X. Liu, Q. Zhang, L. Duan and G. Gao, *ACS Appl. Mater. Interfaces*, 2019, **11**, 6644-6651.
- 6 W. Wang, Y. Xu, A. Li, T. Li, M. Liu, R. V. Klitzing, C. K. Ober, A. B. Kayitmazer, L. Li and X. Guo, *RSC adv.*, 2015, **5**, 66871-66878.
- 7 D. X. Oh, S. Kim, D. Lee and D. S., *Acta Biomater.*, 2015, **20**, 104-112.
- 8 N. D. Sanandiya, S. Lee, S. Rho, H. Lee, I. S. Kim and D. S. Hwang, *Carbohydr. Polym.*, 2019, **208**, 77-85.
- 9 E. Y. Jeon, B. H. Hwang, Y. J. Yang, B. J. Kim, B. H. Choi, G. Y. Jung and H. J. Cha, *Biomaterials*, 2015, **67**, 11-19.
- 10 C. E. Brubaker and P. B. Messersmith, *Biomacromolecules*, 2011, **12**, 4326-4334.
- 11 J. Xu, X. Li, J. Li, X. Li, B. Li, Y. Wang, L. Wu and W. Li, *Angew. Chem. Int. Ed.*, 2017, **56**, 8731-8735.
- 12 Z. Wu, L. Li, Y. Mu and X. Wan, *Macromol. Chem. Phys.*, 2017, **218**, 1700206-1700214.
- 13 J. Xu, X. Li, X. Li, B. Li, L. Wu, W. Li, X. Xie and R. Xue, *Biomacromolecules*, 2017, **18**, 3524-3530.
- 14 K. Zhan, C. Kim, K. Sung, H. Ejima and N. Yoshie, *Biomacromolecules*, 2017, **18**, 2959-2966.

- 15 H. Shao and R. J. Stewart, *Adv. Mater.*, 2010, **22**, 729-733.
- 16 J. D. White and J. J. Wilker, *Macromolecules*, 2011, **44**, 5085-5088.
- 17 K. Xu, Y. Liu, S. Bu, T. Wu, Q. Chang, G. Singh, X. Cao, C. Deng, B. Li, G. Luo and M. Xing, *Adv. Healthcare Mater.*, 2017, **6**, 1700132-1700141.
- 18 M. J. Brennan, B. F. Kilbride, J. J. Wilker and J. C. Liu, *Biomaterials*, 2017, **124**, 116-125.
